# Supplementary material for: A simple synthesis of nitrogen-doped carbon micro- and nanotubes
Source: Royal Society of Chemistry journal article supplement (doi:10.1039/c5cc04621a), 2015-01-01
Supplement: c5cc04621a1.pdf [file c5cc04621a1.pdf]

## Supplementary Information for

A Simple Synthesis of Nitrogen-Doped Carbon Micro- and Nanotubes

Hoon T. Chung and Piotr Zelenay\*

Materials Physics and Applications Division, Los Alamos National Laboratory  
Los Alamos, New Mexico 87545, USA

\*To whom correspondence should be addressed; e-mail: [zelenay@lanl.gov](mailto:zelenay@lanl.gov)

**This PDF file includes:** Figs. S1 to S7

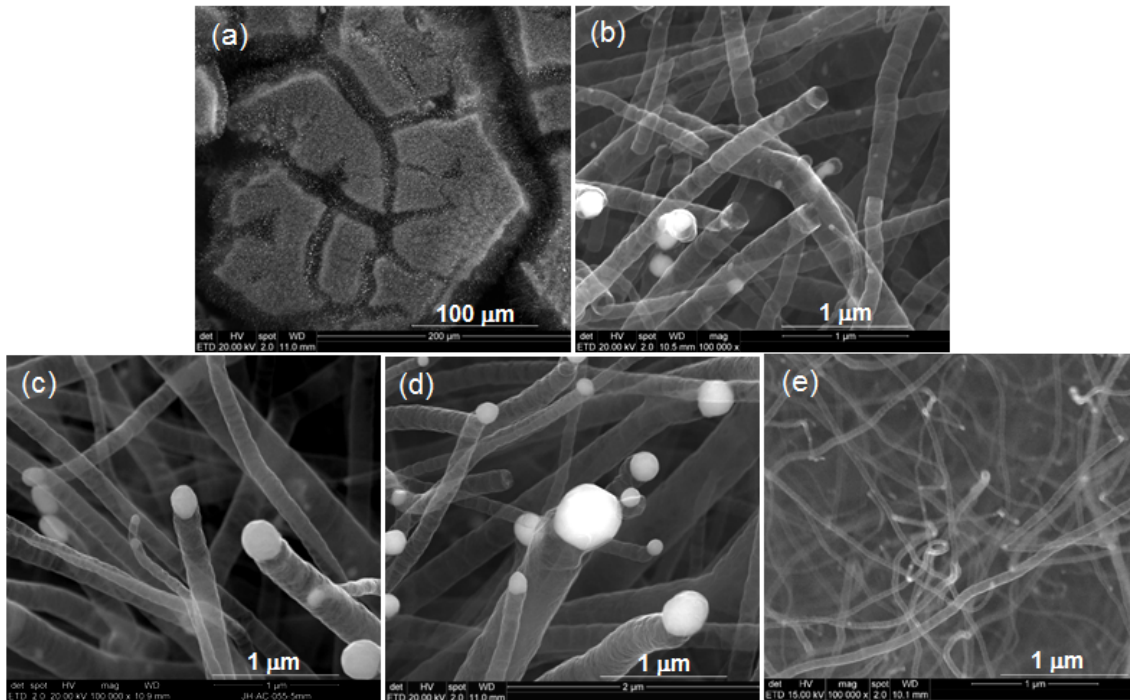

**Fig. S1.** SEM images of Ni-catalyzed N-CNTs: (a) heat-treated at 1050°C for 30 minutes, ×1,000 magnification; (b) heat-treated at 850°C for 30 minutes, ×100,000 magnification; (c) heat-treated at 950°C for 30 minutes, ×100,000 magnification; (d) heat-treated at 1050°C for 30 minutes, ×100,000 magnification; (e) heat-treated at 850°C for 3 minutes. 100,000 magnification.

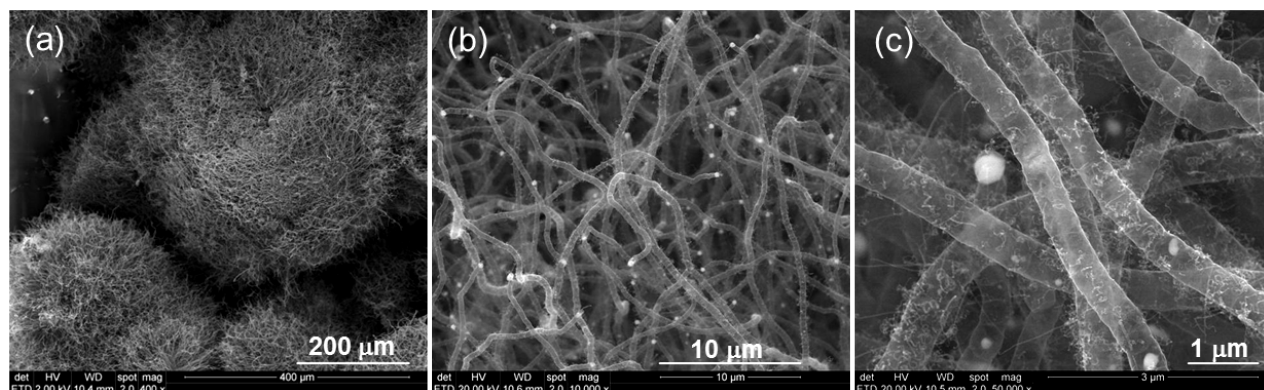

**Fig. S2.** SEM images of Co-catalyzed N-CNTs containing nano-tentacles: (A) ×400 magnification; (B) ×10,000 magnification (primary structure visible); (C) ×50,000 magnification (primary and secondary nano-tentacle structures visible).

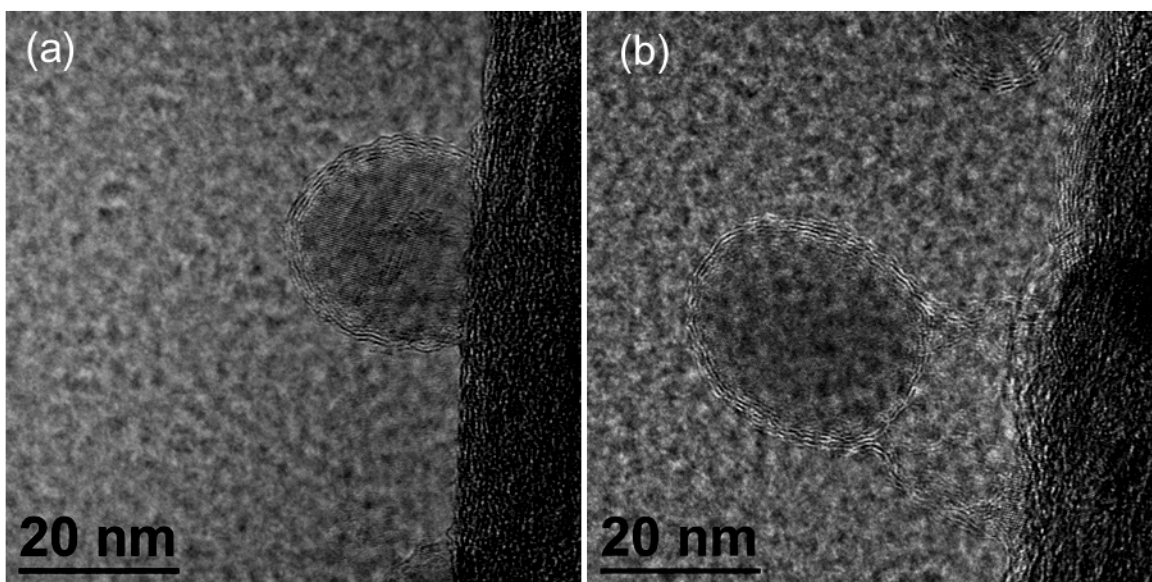

**Fig. S3.** TEM images of Co-catalyzed carbon nano-tentacle: (A) a Co nanoparticle encapsulated in several graphene layers, attached to the large-diameter carbon tube; (B) a small-diameter N-CNT that has grown away from the large-diameter carbon tube.

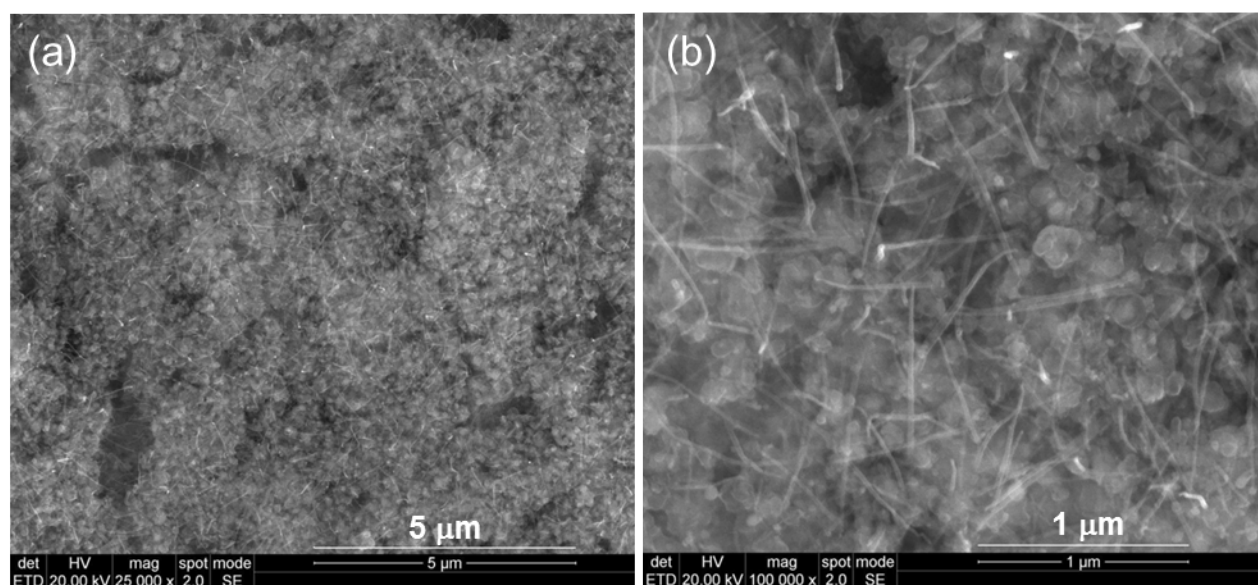

**Fig. S4.** SEM images of *ca.* 20 nm N-CNTs obtained using Fe as a growth catalyst in the presence of dispersed  $\text{TiO}_2$ : (A) N-CNTs uniformly scattered in the  $\text{TiO}_2$  phase,  $\times 25,000$  magnification; (B)  $\times 100,000$  magnification.

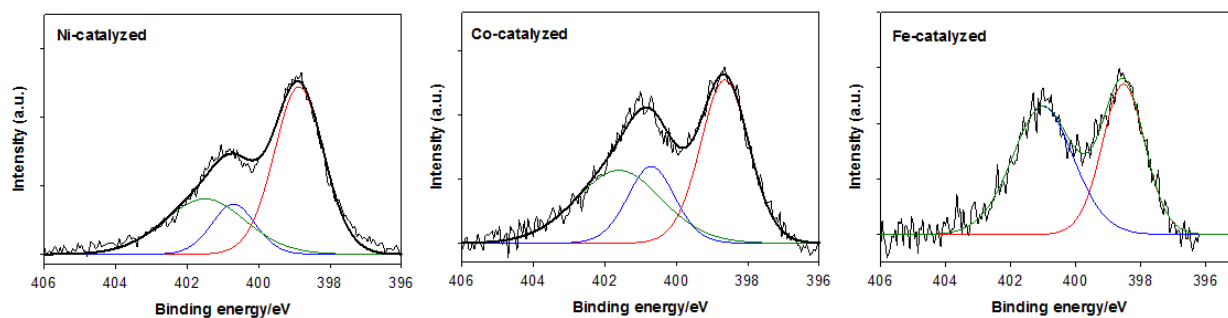

**Fig. S5.** N1s XPS spectra of Ni-, Co-, and Fe-catalyzed carbon tubes. Thin black line – measured data; thick dark-blue line – curve fit. Spectra deconvolution: red line – pyridinic nitrogen ( $398.7 \pm 0.2$  eV); blue line – pyrrolic nitrogen ( $400.7 \pm 0.2$  eV); green line – graphitic nitrogen ( $401.5 \pm 0.2$  eV).

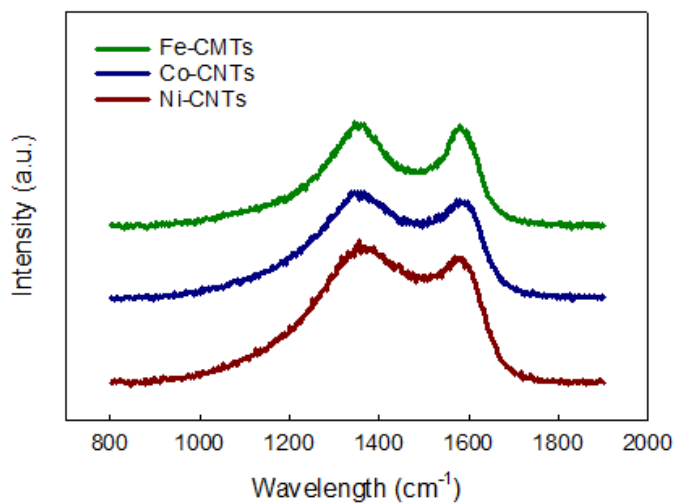

**Fig. S6.** Raman spectra of Ni-, Co-, and Fe-catalyzed carbon tubes.

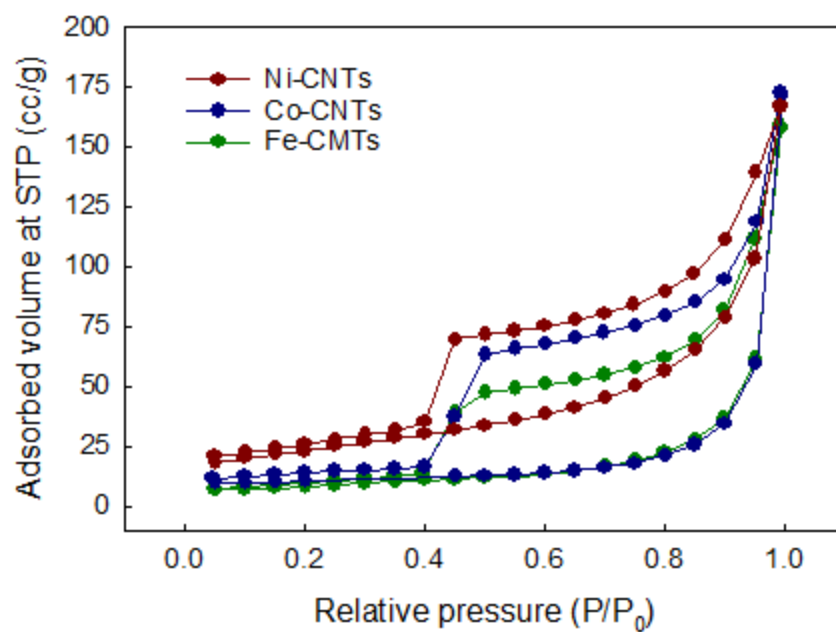

**Fig. S7.** Nitrogen sorption isotherms obtained with Ni-, Co-, and Fe-catalyzed carbon tubes.
